# Supplementary material for: In Vitro Regeneration from Leaf Explants of Helianthus verticillatus, a Critically Endangered Sunflower
Source: MDPI journal article supplement (doi:10.3390/plants13020285), 2024-01-18
Supplement: s1 [file s1]

Table S1. Analysis of Variance (ANOVA) for the parameters examined for *in vitro* shoot regeneration rate from leaf explants of *Helianthus verticillatus*.

| Tested Parameters             | Variation Source     | Sum of Squares | F Value | P value<br>[Pr(>F)] |
|-------------------------------|----------------------|----------------|---------|---------------------|
| Explants forming callus (%)   | Induction Medium (M) | 273641.0       | 1709.1  | <2.2E-16***         |
|                               | Genotype (G)         | 107.0          | 3.0     | 5.4E-02ns           |
|                               | M × G                | 1015.0         | 3.2     | 1.6E-04***          |
| Explants forming shoots (%)   | Induction Medium (M) | 6598.3         | 24.9    | <2.2E-16***         |
|                               | Genotype (G)         | 2922.3         | 49.6    | 3.0E-15***          |
|                               | M × G                | 6830.7         | 12.9    | <2.2E-16***         |
| Number of shoots per explants | Induction Medium (M) | 3.8            | 10.3    | 9.9E-11***          |
|                               | Genotype (G)         | 1.6            | 19.7    | 7.9E-08***          |
|                               | M × G                | 4.5            | 6.0     | 2.8E-09***          |

\* — significant at  $p < 0.05$ ; \*\* — significant at  $p < 0.01$ ; \*\*\* — significant at  $p < 0.001$ ; ns — not significant.
