# Supplementary material for: In Vitro Regeneration from Leaf Explants of Helianthus verticillatus, a Critically Endangered Sunflower
Source: MDPI journal article supplement (doi:10.3390/plants13020285), 2024-01-18
Supplement: s1 [file s1]

Table S5. Media tested for *in vitro* shoot induction from leaf explants of *Helianthus verticillatus*, including plant growth regulators composition and their respective concentrations.

| Induction Medium | Plant growth regulators (μM)                            | References |
|------------------|---------------------------------------------------------|------------|
| MS0              | Without plant growth regulators                         | -          |
| MS1*             | BA (8.88) + NAA (1.08)                                  | [41]       |
| MS1CH*           | BA (8.88) + NAA (1.08) + CH (500 μM × L <sup>-1</sup> ) | [41]       |
| MS2              | BA (4.44) + NAA (0.54)                                  | [42]       |
| MS3 (KR)*        | BA (2.20) + NAA (2.68)                                  | [37]       |
| MS4 (MSD4)       | BA (2.20) + NAA (0.27)                                  | [39]       |
| MS5              | ZEARIB (2.82)                                           | [32]       |
| MS6              | BA (2.22)                                               | [42]       |
| MS7              | BA (4.44)                                               | [42]       |
| MS8              | BA (8.88)                                               | [42]       |

\*Media were used for further research in the second experiment that assessed the regeneration efficiency of different *H. verticillatus* genotypes, both in an *in vivo* and *in vitro* propagated plant
