# Supplementary material for: In Vitro Regeneration from Leaf Explants of Helianthus verticillatus, a Critically Endangered Sunflower
Source: MDPI journal article supplement (doi:10.3390/plants13020285), 2024-01-18
Supplement: s1 [file s1]

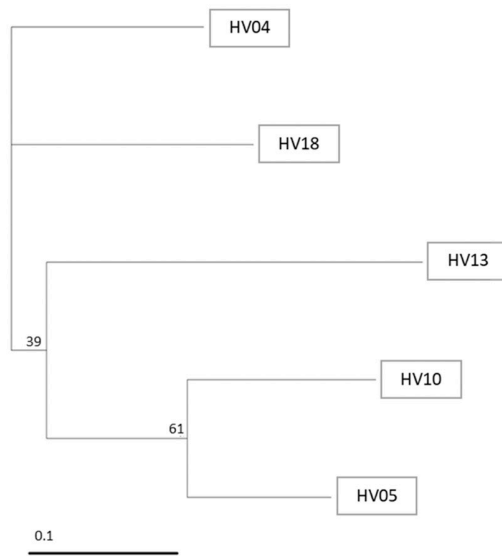

Figure S1: A dendrogram generated for genotypic data from 15 polymorphic microsatellite markers (SSRs), illustrating the genetic distance among the donor plants of *Helianthus verticillatus*. The matrix of genetic distances was calculated in R version 3.6.1 using RStudio version 1.2.5019, and the package *poppr* version 2.8.3 [68] with Bruvo's genetic distance [69] that regards the repeated motif lengths. Bootstrap support values for each split were calculated over 10,000 permutations of the dataset; only values  $\geq 30$  are displayed
