# Supplementary material for: In Vitro Regeneration from Leaf Explants of Helianthus verticillatus, a Critically Endangered Sunflower
Source: MDPI journal article supplement (doi:10.3390/plants13020285), 2024-01-18
Supplement: s1 [file s1]

Table S3. Two-way ANOVA analysis of the significance of pairwise interactions of among: *Helianthus verticillatus* genotype, explant source, and induction medium on plant regeneration frequency and the number of explants producing shoot.

| Tested parameters                      | Variation source                | Sum of Squares | F value | P value [Pr(>F)] |
|----------------------------------------|---------------------------------|----------------|---------|------------------|
| <i>Genotype × Induction Medium</i>     |                                 |                |         |                  |
| Explants forming shoots (%)            | Genotype                        | 100694.0       | 78.3    | <2.20E-16***     |
|                                        | Induction Medium                | 941.0          | 1.5     | 2.34E-01ns       |
|                                        | Genotype × Induction Medium     | 12242.0        | 4.7     | 2.05E-05***      |
| Number of shoots per explants          | Genotype                        | 348.7          | 54.2    | <2.20E-16***     |
|                                        | Induction Medium                | 3.7            | 1.2     | 3.16E-01***      |
|                                        | Genotype × Induction Medium     | 27.2           | 2.1     | 3.56E-02*        |
| <i>Genotype × Plant Source</i>         |                                 |                |         |                  |
| Explants forming shoots (%)            | Genotype                        | 100694.0       | 74.7    | <2.20E-16***     |
|                                        | Plant Source                    | 4358.0         | 12.9    | 3.97E-04***      |
|                                        | Genotype × Plant Source         | 3624.0         | 2.7     | 3.21E-02***      |
| Number of shoots per explants          | Genotype                        | 348.7          | 74.0    | <2.20E-16***     |
|                                        | Plant Source                    | 36.9           | 31.3    | 6.22E-08***      |
|                                        | Genotype × Plant Source         | 85.1           | 18.1    | 6.50E-03*        |
| <i>Induction Medium × Plant Source</i> |                                 |                |         |                  |
| Explants forming shoots (%)            | Induction Medium                | 941.0          | 0.6     | 5.41E-01ns       |
|                                        | Plant Source                    | 4358.0         | 5.7     | 1.78E-02*        |
|                                        | Induction Medium × Plant Source | 1989.0         | 1.3     | 2.74E-01ns       |
| Number of shoots per explants          | Induction Medium                | 3.7            | 0.6     | 5.36E-01ns       |
|                                        | Plant Source                    | 36.9           | 12.4    | 5.25E-04***      |
|                                        | Induction Medium × Plant Source | 2.9            | 0.5     | 6.18E-01ns       |

\*Significant at  $p < 0.05$ ; \*\*significant at  $p < 0.01$ ; \*\*\*significant at  $p < 0.001$ ; ns not significant.

Due to lack of significance for the triple interaction “genotype × plant source × induction medium” on plant regeneration frequency and the number of explants producing shoot, all possible pairwise interactions of studied factors (genotype, plant source, induction medium) were investigated separately using two-way ANOVAs, followed by post-hoc Tukey HSD tests ( $\alpha = 0.05$ ).
