# Supplementary material for: In Vitro Regeneration from Leaf Explants of Helianthus verticillatus, a Critically Endangered Sunflower
Source: MDPI journal article supplement (doi:10.3390/plants13020285), 2024-01-18
Supplement: s1 [file s1]

Table S2. Effect of explant source, induction medium, and genotype on the *in vitro* shoot regeneration rate of leaf explants from *Helianthus verticillatus*.

| Explant Source | Induction Medium* | Genotype                       |           |           |           |           |
|----------------|-------------------|--------------------------------|-----------|-----------|-----------|-----------|
|                |                   | HV04                           | HV05      | HV10      | HV13      | HV18      |
| In vivo        |                   | Explants forming callus (%)    |           |           |           |           |
|                | MS1               | 98.2±5.1                       | 100.0     | 100.0     | 97.2±7.8  | 98.2±5.1  |
|                | MS1CH             | 96.4±6.6                       | 98.6±3.9  | 100.0     | 97.2±7.8  | 94.6±10.6 |
|                | MS3               | 100.0                          | 98.6±3.9  | 100.0     | 100.0     | 100.0     |
| In vitro       | MS1               | 100.0                          | 100.0     | 100.0     | 100.0     | 100.0     |
|                | MS1CH             | 100.0                          | 100.0     | 100.0     | 100.0     | 100.0     |
|                | MS3               | 100.0                          | 100.0     | 100.0     | 100.0     | 97.9±5.9  |
| In vivo        |                   | Explants forming shoots (%)    |           |           |           |           |
|                | MS1               | 0.0                            | 29.2±23.0 | 2.8±7.8   | 54.2±22.6 | 16.7±14.4 |
|                | MS1CH             | 0.0                            | 29.1±16.7 | 1.4±3.9   | 55.6±22.2 | 10.9±12.3 |
|                | MS3               | 0.0                            | 19.4±22.8 | 26.4±5.7  | 47.2±16.6 | 17.9±10.1 |
| In vitro       | MS1               | 0.0                            | 39.6±19.8 | 18.8±18.8 | 73.4±26.3 | 37.5±26.3 |
|                | MS1CH             | 0.0                            | 39.6±17.7 | 20.9±21.4 | 75.0±17.7 | 20.8±14.8 |
|                | MS3               | 0.0                            | 2.1±5.9   | 37.5±30.5 | 67.2±29.1 | 6.3±12.4  |
| In vivo        |                   | Mean No. of shoots per explant |           |           |           |           |
|                | MS1               | 0.0                            | 1.00±1.26 | 0.03±0.07 | 2.00±1.04 | 0.41±0.40 |
|                | MS1CH             | 0.0                            | 0.71±0.53 | 0.03±0.07 | 2.25±1.45 | 0.25±0.28 |
|                | MS3               | 0.0                            | 0.55±1.24 | 0.49±0.24 | 1.24±0.74 | 0.68±0.68 |
| In vitro       | MS1               | 0.0                            | 1.15±0.43 | 0.63±1.06 | 3.75±1.86 | 1.23±1.13 |
|                | MS1CH             | 0.0                            | 1.17±0.67 | 0.77±0.71 | 6.43±3.66 | 0.33±0.27 |
|                | MS3               | 0.0                            | 0.02±0.06 | 0.96±1.01 | 4.69±1.45 | 0.27±0.55 |

For each genotype, data are the average (±SD) of 64 explants.

\*MS medium supplemented with: 8.88 µM BA and 1.08 µM NAA (MS1); 8.88 µM BA, 1.08 µM NAA, and 500 mg × L<sup>-1</sup> CH (MS1CH); 2.20 µM BA and 2.68 µM NAA (MS3)

For each evaluated trait, a three-way ANOVA was used to analyze the impact of factors (genotype, plant source, and induction medium) on shoot regeneration rate of leaf explants from *H. verticillatus* (Table 2). The triple interaction 'genotype × plant source × induction medium' was not significant for either of the traits. Subsequently, two-way ANOVAs were conducted to test all possible pairwise interactions due to the significant interactions between various factors (Figures 2a,b - 3ab; Table S3).
