# Supplementary material for: In Vitro Regeneration from Leaf Explants of Helianthus verticillatus, a Critically Endangered Sunflower
Source: MDPI journal article supplement (doi:10.3390/plants13020285), 2024-01-18
Supplement: s1 [file s1]

Table S4. Microsatellite loci used to examine genetic distance among the donor plants (HV04; HV05; HV10; HV13; HV18) of *Helianthus verticillatus*.

| Locus                 | Forward (F) and Reverse (R) Primers 5'-3'                | Repeat Motif        | Number of Alleles | Allele Size Range (bp) |
|-----------------------|----------------------------------------------------------|---------------------|-------------------|------------------------|
| HV006 <sup>a</sup>    | F: CATGGGTGATCAATGGAGTG<br>R: CGGCACATAACAAGTGCTTC       | (gtga) <sub>3</sub> | 2                 | 227–267                |
| HV017 <sup>a</sup>    | F: ACTTACCGTTGCATTTGGTG<br>R: GCTTATCCCTAGAACACGATTACAG  | (taa) <sub>4</sub>  | 2                 | 109–112                |
| HV021 <sup>a</sup>    | F: AAGTCGCACAGGAAGGAGATAG<br>R: TTGCTTGGAAGCCAATGAG      | (ttgt) <sub>3</sub> | 2                 | 101–105                |
| HV037 <sup>a</sup>    | F: GGTTAGGGTGAGGGTGGTG<br>R: AAGCCATAGTAAGTTCCTCTTACAAAC | (tgca) <sub>3</sub> | 3                 | 155–179                |
| HV042 <sup>a</sup>    | F: GGTTACAACGGTGGAAGTCCG<br>R: TCCGGTTCACCAATTCATTC      | (ggc) <sub>4</sub>  | 2                 | 367–373                |
| Hvert002 <sup>b</sup> | F: ATTCAGGGTTTCTGCCAGTGG<br>R: GAACTGATACCGACGCAAACC     | (ca) <sub>2</sub>   | 3                 | 234–258                |
| Hvert005 <sup>b</sup> | F: GTCTTCAACTCAAACCACTAGCC<br>R: CAAGTTGTGCCCCGATTTGTAGG | (ag) <sub>7</sub>   | 2                 | 215–233                |
| Hvert015 <sup>b</sup> | F: GGTTCTTACAACCTCGAGGTGG<br>R: AACATCCAGTTGGGCTAACC     | (ta) <sub>9</sub>   | 3                 | 155–185                |
| Hvert026 <sup>b</sup> | F: TTCCAGAGGCCGACTTCAAGG<br>R: ATAGGTGTGTGGAAGCCATGG     | (gaa) <sub>6</sub>  | 2                 | 237–249                |
| Hvert028 <sup>b</sup> | F: GCGGATGATTCTTAGCACTAACC<br>R: TGGAAATAGAAAGAATTCCGGGC | (cca) <sub>6</sub>  | 2                 | 244–280                |
| Hvert030 <sup>b</sup> | F: CAACCATGCTGTCATCACTGG<br>R: GAGAATGGTGGTGTCCAGACC     | (tcc) <sub>6</sub>  | 3                 | 170–179                |
| Hvert033 <sup>b</sup> | F: GTGGGTGAAAGGAAAGTGTGG<br>R: GATCTCTCCATCTCTCGGTGC     | (gaa) <sub>7</sub>  | 2                 | 130–136                |
| Hvert042 <sup>b</sup> | F: TTGGAAACAGCCTCTCTATCG<br>R: CGTCGCCATTAGAGACTTTGG     | (gttt) <sub>7</sub> | 2                 | 200–208                |
| Hvert045 <sup>b</sup> | F: ATGTTCCCTGCTCTTCGATCG<br>R: TTAATCCGCCCTGCAGTTAGG     | (catt) <sub>5</sub> | 2                 | 133–145                |
| Hvert046 <sup>b</sup> | F: ATGAGAAACCAGCTGTCGTCC<br>R: ACCCTCAAATCTCTTCTAAACC    | (agaa) <sub>5</sub> | 3                 | 282–318                |

<sup>a</sup> Loci renamed by Edwards et al. [65] and taken from Pashley et al. [64];

<sup>b</sup> Loci obtained from our transcriptome experiments (The reads were deposited in the Sequence Read Archive (SRA) database of the U.S. National Center for Biotechnology Information (NCBI) -PRNJA778959).
