# Supplementary material for: In Vitro Regeneration from Leaf Explants of Helianthus verticillatus, a Critically Endangered Sunflower
Source: Plants (Basel). 2024 Jan 18;13(2):285. doi: 10.3390/plants13020285 (PMC10820345; doi:10.3390/plants13020285)
Supplement: Supplementary file 1 [file plants-13-00285-s001.zip]

Archive with 6 entries (6 files):
- Nowakowska Figure S1.pdf
- Nowakowska Table S1.pdf
- Nowakowska Table S2.pdf
- Nowakowska Table S3.pdf
- Nowakowska Table S4.pdf
- Nowakowska Table S5.pdf
